# Supplementary material for: Visual Motor Reaction Times Predict Receptive and Expressive Language Development in Early School-Age Children
Source: MDPI journal article supplement (doi:10.3390/brainsci13060965), 2023-06-19
Supplement: s1 [file s1]

## *Supplementary Material*

**Supplementary Table S1** Post Hoc Comparisons of sex-related differences in PPVT, EVT and RAN

| Gender |        | Prior Odds | Posterior Odds | BF <sub>10, U</sub> | error % |
|--------|--------|------------|----------------|---------------------|---------|
|        |        |            | <b>a. PPVT</b> |                     |         |
| Male   | Female | 1.000      | 0.830          | 0.830               | 0.010   |
|        |        |            | <b>b. EVT</b>  |                     |         |
| Male   | Female | 1.000      | 0.265          | 0.265               | 0.011   |
|        |        |            | <b>c. RAN</b>  |                     |         |
| Male   | Female | 1.000      | 0.265          | 0.265               | 0.011   |

Note. The posterior odds have been corrected for multiple testing by fixing the prior probability to 0.5 that the null hypothesis holds across all comparisons. Individual comparisons are based on the default t-test with a Cauchy (0,  $r = 1/\sqrt{2}$ ) prior. The "U" in the Bayes factor denotes that it is uncorrected.

**Supplementary Table S2** Bayesian Pearson Correlations (5-6 group)

| Variable |                  | RCPM   | AS        | VS     | AVS    | EHC     | PPVT    | EVT    | RAN |
|----------|------------------|--------|-----------|--------|--------|---------|---------|--------|-----|
| 1. RCPM  | Pearson's r      | —      |           |        |        |         |         |        |     |
|          | BF <sub>10</sub> | —      |           |        |        |         |         |        |     |
| 2. AS    | Pearson's r      | 0.078  | —         |        |        |         |         |        |     |
|          | BF <sub>10</sub> | 0.312  | —         |        |        |         |         |        |     |
| 3. VS    | Pearson's r      | 0.102  | 0.540     | —      |        |         |         |        |     |
|          | BF <sub>10</sub> | 0.321  | 3.033     | —      |        |         |         |        |     |
| 4. AVS   | Pearson's r      | 0.195  | 0.849 *** | 0.580  | —      |         |         |        |     |
|          | BF <sub>10</sub> | 0.389  | 1469.533  | 4.702  | —      |         |         |        |     |
| 5. EHC   | Pearson's r      | -0.434 | 0.201     | 0.061  | 0.375  | —       |         |        |     |
|          | BF <sub>10</sub> | 1.219  | 0.395     | 0.307  | 0.829  | —       |         |        |     |
| 6. PPVT  | Pearson's r      | 0.207  | 0.184     | -0.046 | 0.329  | 0.112   | —       |        |     |
|          | BF <sub>10</sub> | 0.403  | 0.378     | 0.304  | 0.649  | 0.326   | —       |        |     |
| 7. EVT   | Pearson's r      | 0.445  | -0.284    | -0.219 | -0.208 | -0.486  | 0.647 * | —      |     |
|          | BF <sub>10</sub> | 1.323  | 0.528     | 0.417  | 0.403  | 1.837   | 11.312  | —      |     |
| 8. RAN   | Pearson's r      | 0.014  | 0.128     | 0.054  | 0.235  | 0.639 * | -0.002  | -0.371 | —   |
|          | BF <sub>10</sub> | 0.300  | 0.335     | 0.306  | 0.438  | 10.120  | 0.300   | 0.812  | —   |

Note. Age = age in numbers; RCPM = nonverbal IQ of Raven; AS = MRTs of auditory stimuli; VS = MRTs of visual stimuli; AVS = MRTs of audiovisual stimuli; EHC = SLURP visual motor skills; PPVT= Peabody picture vocabulary test; EVT= expressive vocabulary test; RAN = rapid automatized task. \* BF<sub>10</sub> > 10, \*\* BF<sub>10</sub> > 30, \*\*\* BF<sub>10</sub> > 100.\*

**Supplementary Table S3** Bayesian Pearson Correlations (7-8 group)

| Variable |                  | RCPM    | AS        | VS        | AVS    | EHC    | PPVT    | EVT    | RAN |
|----------|------------------|---------|-----------|-----------|--------|--------|---------|--------|-----|
| 1. RCPM  | Pearson's r      | —       |           |           |        |        |         |        |     |
|          | BF <sub>10</sub> | —       |           |           |        |        |         |        |     |
| 2. AS    | Pearson's r      | -0.212  | —         |           |        |        |         |        |     |
|          | BF <sub>10</sub> | 0.404   | —         |           |        |        |         |        |     |
| 3. VS    | Pearson's r      | -0.458  | 0.745 *** | —         |        |        |         |        |     |
|          | BF <sub>10</sub> | 1.904   | 205.786   | —         |        |        |         |        |     |
| 4. AVS   | Pearson's r      | -0.514  | 0.751 *** | 0.856 *** | —      |        |         |        |     |
|          | BF <sub>10</sub> | 3.425   | 240.997   | 12791.937 | —      |        |         |        |     |
| 5. EHC   | Pearson's r      | 0.137   | -0.098    | -0.169    | -0.148 | —      |         |        |     |
|          | BF <sub>10</sub> | 0.323   | 0.300     | 0.351     | 0.332  | —      |         |        |     |
| 6. PPVT  | Pearson's r      | 0.479   | -0.213    | -0.306    | -0.373 | -0.159 | —       |        |     |
|          | BF <sub>10</sub> | 2.348   | 0.405     | 0.621     | 0.945  | 0.342  | —       |        |     |
| 7. EVT   | Pearson's r      | 0.622 * | -0.236    | -0.358    | -0.420 | 0.145  | 0.660 * | —      |     |
|          | BF <sub>10</sub> | 15.206  | 0.444     | 0.850     | 1.362  | 0.329  | 29.668  | —      |     |
| 8. RAN   | Pearson's r      | -0.078  | 0.210     | 0.026     | 0.052  | 0.052  | -0.206  | -0.206 | —   |
|          | BF <sub>10</sub> | 0.291   | 0.401     | 0.278     | 0.283  | 0.283  | 0.395   | 0.394  | —   |

Note. Age = age in numbers; RCPM = nonverbal IQ of Raven; AS = MRTs of auditory stimuli; VS = MRTs of visual stimuli; AVS = MRTs of audiovisual stimuli; EHC = SLURP visual motor skills; PPVT= Peabody picture vocabulary test; EVT= expressive vocabulary test; RAN = rapid automatized task. \* BF<sub>10</sub> > 10, \*\* BF<sub>10</sub> > 30, \*\*\* BF<sub>10</sub> > 100.

**Supplementary Table S4** Bayesian Pearson Correlations (9-10 group)

| Variable |                  | RCPM      | AS        | VS        | AVS   | EHC   | PPVT     | EVT   | RAN |
|----------|------------------|-----------|-----------|-----------|-------|-------|----------|-------|-----|
| 1. RCPM  | Pearson's r      | —         |           |           |       |       |          |       |     |
|          | BF <sub>10</sub> | —         |           |           |       |       |          |       |     |
| 2. AS    | Pearson's r      | -0.403    | —         |           |       |       |          |       |     |
|          | BF <sub>10</sub> | 2.154     | —         |           |       |       |          |       |     |
| 3. VS    | Pearson's r      | -0.588 ** | 0.877 *** | —         |       |       |          |       |     |
|          | BF <sub>10</sub> | 48.664    | 2.286e+7  | —         |       |       |          |       |     |
| 4. AVS   | Pearson's r      | -0.505    | 0.771 *** | 0.862 *** | —     |       |          |       |     |
|          | BF <sub>10</sub> | 9.439     | 19724.413 | 6.425e+6  | —     |       |          |       |     |
| 5. EHC   | Pearson's r      | -0.452    | 0.538     | 0.437     | 0.401 | —     |          |       |     |
|          | BF <sub>10</sub> | 2.589     | 8.147     | 2.170     | 1.507 | —     |          |       |     |
| 6. PPVT  | Pearson's r      | 0.357     | -0.092    | -0.192    | -     | -     | —        |       |     |
|          | BF <sub>10</sub> | 0.968     | 0.281     | 0.372     | 0.182 | 0.355 | —        |       |     |
| 7. EVT   | Pearson's r      | 0.572     | -0.679 ** | -0.570    | -     | -     | 0.695 ** | —     |     |
|          | BF <sub>10</sub> | 7.038     | 42.875    | 6.902     | 0.557 | 0.540 | 60.628   | —     |     |
| 8. RAN   | Pearson's r      | -0.341    | 0.327     | 0.346     | 0.337 | 0.378 | -0.198   | -     | —   |
|          | BF <sub>10</sub> | 1.012     | 0.895     | 1.058     | 0.973 | 1.216 | 0.382    | 0.396 | —   |

Note. Age = age in numbers; RCPM = nonverbal IQ of Raven; AS = MRTs of auditory stimuli; VS = MRTs of visual stimuli; AVS = MRTs of audiovisual stimuli; EHC= Slurp visual motor skills; PPVT= Peabody picture vocabulary test; EVT= expressive vocabulary test; RAN = rapid automatized task. \* BF<sub>10</sub> > 10, \*\* BF<sub>10</sub> > 30, \*\*\* BF<sub>10</sub> > 100.

**Supplementary Table S5** Bayesian Multiple Regressions for Age, Nonverbal IQ and Multisensory MRT (Auditory, visual, and audiovisual), EHC SLURP and RAN Predict Receptive and Expressive Vocabulary Tests

| Model predictors       | P(M)  | P(M data) | BF <sub>M</sub> | BF <sub>10</sub> | R <sup>2</sup> |
|------------------------|-------|-----------|-----------------|------------------|----------------|
| <b>a. PPVT</b>         |       |           |                 |                  |                |
| Age + RCPM             | 0.008 | 0.137     | 20.236          | 1.000            | 0.476          |
| Age                    | 0.008 | 0.098     | 13.844          | 0.715            | 0.430          |
| RCPM                   | 0.008 | 0.047     | 6.252           | 0.341            | 0.412          |
| Age + RCPM + AVS       | 0.008 | 0.043     | 5.676           | 0.311            | 0.483          |
| Age + IQ + AS          | 0.008 | 0.041     | 5.453           | 0.300            | 0.483          |
| Age + RCPM + EHC SLURP | 0.008 | 0.036     | 4.714           | 0.260            | 0.479          |
| Age + RCPM + RAN       | 0.008 | 0.033     | 4.320           | 0.239            | 0.477          |
| Age + RCPM + VS        | 0.008 | 0.032     | 4.140           | 0.230            | 0.476          |
| RCPM + VS              | 0.008 | 0.027     | 3.589           | 0.200            | 0.438          |
| Age + AS               | 0.008 | 0.027     | 3.564           | 0.199            | 0.438          |
| <b>b. EVT</b>          |       |           |                 |                  |                |
| RCPM + AS              | 0.008 | 0.095     | 13.316          | 1.000            | 0.665          |
| Age + RCPM             | 0.008 | 0.080     | 10.991          | 0.839            | 0.662          |
| Age + RCPM + AS        | 0.008 | 0.075     | 10.250          | 0.787            | 0.688          |
| RCPM + AS + RAN        | 0.008 | 0.053     | 7.160           | 0.562            | 0.683          |
| RCPM + AVS             | 0.008 | 0.053     | 7.042           | 0.554            | 0.656          |
| RCPM + VS              | 0.008 | 0.038     | 5.070           | 0.405            | 0.651          |
| Age + RCPM + AVS       | 0.008 | 0.037     | 4.897           | 0.391            | 0.678          |
| RCPM + AVS + RAN       | 0.008 | 0.035     | 4.612           | 0.369            | 0.677          |
| Age + RCPM + VS        | 0.008 | 0.030     | 3.994           | 0.321            | 0.675          |
| Age + RCPM + RAN       | 0.008 | 0.030     | 3.942           | 0.317            | 0.675          |

Note. Age = age in numbers; RCPM = nonverbal IQ of Raven; AS = MRTs of auditory stimuli; VS = MRTs of visual stimuli; AVS = MRTs of audiovisual stimuli; EHC= Slurp visual motor skills; PPVT= Peabody picture vocabulary test; EVT= expressive vocabulary test; RAN= rapid automatized task. .

**Supplementary Table S6** Posterior Summaries of Regression Coefficients

| Coefficient    | P(incl)      | P(incl data) | BF <sub>inclusion</sub> | Mean         | SD           | 95% Credible Interval |               |
|----------------|--------------|--------------|-------------------------|--------------|--------------|-----------------------|---------------|
|                |              |              |                         |              |              | Lower                 | Upper         |
| <i>a. PPVT</i> |              |              |                         |              |              |                       |               |
| Intercept      | 1.000        | 1.000        | 1.000                   | 138.113      | 2.370        | 133.871               | 143.015       |
| Agenumbers     | <b>0.500</b> | <b>0.804</b> | <b>4.095</b>            | <b>5.660</b> | <b>3.849</b> | <b>-0.067</b>         | <b>11.791</b> |
| RCPM           | <b>0.500</b> | <b>0.685</b> | <b>2.175</b>            | <b>0.982</b> | <b>0.884</b> | <b>0.000</b>          | <b>2.575</b>  |
| AS             | 0.500        | 0.241        | 0.318                   | 0.003        | 0.013        | -0.005                | 0.050         |
| VS             | 0.500        | 0.263        | 0.358                   | -0.006       | 0.019        | -0.055                | 0.027         |
| AVS            | 0.500        | 0.254        | 0.341                   | 0.005        | 0.020        | -0.024                | 0.069         |
| EHC SLURP      | 0.500        | 0.219        | 0.280                   | 0.009        | 0.074        | -0.134                | 0.195         |
| RAN            | 0.500        | 0.209        | 0.264                   | 0.006        | 0.118        | -0.238                | 0.358         |
| <i>b. EVT</i>  |              |              |                         |              |              |                       |               |
| Intercept      | 1.000        | 1.000        | 1.000                   | 100.373      | 1.519        | 97.448                | 103.568       |
| Agenumbers     | 0.500        | 0.456        | 0.840                   | 1.595        | 2.229        | -0.367                | 6.091         |
| RCPM           | <b>0.500</b> | <b>0.985</b> | <b>64.072</b>           | <b>1.535</b> | <b>0.459</b> | <b>0.729</b>          | <b>2.552</b>  |
| AS             | 0.500        | 0.470        | 0.886                   | -0.013       | 0.017        | -0.050                | 0.000         |
| VS             | 0.500        | 0.287        | 0.402                   | -0.007       | 0.017        | -0.056                | 1.646e-4      |
| AVS            | 0.500        | 0.304        | 0.436                   | -0.008       | 0.018        | -0.061                | 0.000         |
| EHC SLURP      | 0.500        | 0.207        | 0.261                   | -0.016       | 0.058        | -0.238                | 1.731e-4      |
| RAN            | 0.500        | 0.338        | 0.511                   | -0.079       | 0.145        | -0.458                | 0.030         |

Note. Age = age in numbers; RCPM = nonverbal IQ of Raven; AS = MRTs of auditory stimuli; VS = MRTs of visual stimuli; AVS = MRTs of audiovisual stimuli; EHC= Slurp visual motor skills; PPVT= Peabody picture vocabulary test; EVT= expressive vocabulary test; RAN = rapid automatized task.

**Supplementary Table S7** Bayesian Multiple Regressions for Age, Nonverbal IQ, PPVT, EVT and Rapid Automatized Naming (RAN) Predict Multisensory MRT (Auditory, visual, and audiovisual) and EHC SLURP

| Model predictors              | P(M)  | P(M data) | BF <sub>M</sub> | BF <sub>10</sub> | R <sup>2</sup> |
|-------------------------------|-------|-----------|-----------------|------------------|----------------|
| <b>a. AS</b>                  |       |           |                 |                  |                |
| PPVT + EVT + Age              | 0.031 | 0.273     | 11.633          | 1.000            | 0.453          |
| Age                           | 0.031 | 0.123     | 4.366           | 0.452            | 0.361          |
| EVT + Age                     | 0.031 | 0.100     | 3.449           | 0.367            | 0.395          |
| PPVT + EVT + Age + RCPM       | 0.031 | 0.098     | 3.364           | 0.359            | 0.460          |
| PPVT + EVT + RAN + Age        | 0.031 | 0.077     | 2.600           | 0.284            | 0.454          |
| EVT                           | 0.031 | 0.038     | 1.234           | 0.140            | 0.330          |
| PPVT + EVT                    | 0.031 | 0.034     | 1.082           | 0.124            | 0.367          |
| PPVT + EVT + RAN + Age + RCPM | 0.031 | 0.032     | 1.030           | 0.118            | 0.461          |
| PPVT + Age                    | 0.031 | 0.032     | 1.017           | 0.116            | 0.366          |
| EVT + Age + RCPM              | 0.031 | 0.031     | 1.002           | 0.115            | 0.400          |
| <b>b. VS</b>                  |       |           |                 |                  |                |
| Age + RCPM                    | 0.031 | 0.195     | 7.494           | 1.000            | 0.532          |
| Age                           | 0.031 | 0.194     | 7.479           | 0.998            | 0.497          |
| EVT + Age                     | 0.031 | 0.164     | 6.075           | 0.842            | 0.528          |
| EVT + Age + RCPM              | 0.031 | 0.080     | 2.684           | 0.409            | 0.545          |
| EVT + RAN + Age               | 0.031 | 0.048     | 1.579           | 0.249            | 0.536          |
| RAN + Age + RCPM              | 0.031 | 0.044     | 1.415           | 0.224            | 0.534          |
| PPVT + Age                    | 0.031 | 0.042     | 1.352           | 0.215            | 0.502          |
| PPVT + Age + RCPM             | 0.031 | 0.041     | 1.338           | 0.213            | 0.533          |
| PPVT + EVT + Age              | 0.031 | 0.038     | 1.229           | 0.196            | 0.531          |
| RAN + Age                     | 0.031 | 0.038     | 1.223           | 0.195            | 0.500          |
| <b>c. AVS</b>                 |       |           |                 |                  |                |
| Age                           | 0.031 | 0.263     | 11.089          | 1.000            | 0.482          |
| PPVT + EVT + Age              | 0.031 | 0.134     | 4.793           | 0.508            | 0.535          |
| EVT + Age                     | 0.031 | 0.126     | 4.483           | 0.480            | 0.503          |
| Age + RCPM                    | 0.031 | 0.103     | 3.566           | 0.392            | 0.498          |
| PPVT + Age                    | 0.031 | 0.051     | 1.660           | 0.193            | 0.484          |
| RAN + Age                     | 0.031 | 0.050     | 1.616           | 0.188            | 0.483          |
| PPVT + EVT + RAN + Age        | 0.031 | 0.049     | 1.591           | 0.185            | 0.543          |
| PPVT + EVT + Age + RCPM       | 0.031 | 0.042     | 1.375           | 0.161            | 0.541          |
| EVT + Age + RCPM              | 0.031 | 0.037     | 1.193           | 0.141            | 0.509          |
| EVT + RAN + Age               | 0.031 | 0.033     | 1.073           | 0.127            | 0.507          |
| <b>d. EHC</b>                 |       |           |                 |                  |                |
| Age                           | 0.031 | 0.349     | 16.624          | 1.000            | 0.418          |
| RAN + Age                     | 0.031 | 0.149     | 5.439           | 0.428            | 0.438          |
| EVT + Age                     | 0.031 | 0.085     | 2.879           | 0.243            | 0.423          |
| Age + RCPM                    | 0.031 | 0.077     | 2.569           | 0.219            | 0.420          |
| PPVT + Age                    | 0.031 | 0.072     | 2.410           | 0.207            | 0.419          |
| EVT + RAN + Age               | 0.031 | 0.040     | 1.306           | 0.116            | 0.440          |
| RAN + Age + RCPM              | 0.031 | 0.040     | 1.301           | 0.115            | 0.440          |
| PPVT + RAN + Age              | 0.031 | 0.038     | 1.219           | 0.108            | 0.438          |
| PPVT + EVT + Age              | 0.031 | 0.028     | 0.905           | 0.081            | 0.430          |
| EVT + Age + RCPM              | 0.031 | 0.022     | 0.697           | 0.063            | 0.423          |

Note. Age = age in numbers; RCPM = nonverbal IQ of Raven; AS = MRTs of auditory stimuli; VS = MRTs of visual stimuli; AVS = MRTs of audiovisual stimuli; EHC= Slurp visual motor skills; PPVT= Peabody picture vocabulary test; EVT= expressive vocabulary test; RAN = rapid automatized task.



**Supplementary Table S8** Posterior Summaries of Regression Coefficients

| Coefficient | P(incl) | P(incl data) | BF <sub>inclusion</sub> | Mean    | SD     | 95% Credible Interval |         |
|-------------|---------|--------------|-------------------------|---------|--------|-----------------------|---------|
|             |         |              |                         |         |        | Lower                 | Upper   |
| a. AS       |         |              |                         |         |        |                       |         |
| Intercept   | 1.000   | 1.000        | 1.000                   | 870.743 | 16.020 | 841.710               | 903.974 |
| PPVT        | 0.500   | 0.589        | 1.433                   | 1.369   | 1.501  | -0.077                | 4.411   |
| EVT         | 0.500   | 0.763        | 3.220                   | -3.182  | 2.432  | -7.387                | 0.000   |
| RAN         | 0.500   | 0.218        | 0.278                   | -0.008  | 0.844  | -2.143                | 2.341   |
| Age         | 0.500   | 0.883        | 7.523                   | -39.859 | 21.397 | -71.086               | 0.000   |
| RCPM        | 0.500   | 0.240        | 0.316                   | 0.447   | 2.194  | -2.407                | 7.833   |
| b. VS       |         |              |                         |         |        |                       |         |
| Intercept   | 1.000   | 1.000        | 1.000                   | 904.920 | 12.908 | 880.460               | 932.501 |
| PPVT        | 0.500   | 0.191        | 0.237                   | -0.003  | 0.430  | -1.335                | 0.754   |
| EVT         | 0.500   | 0.421        | 0.728                   | -0.830  | 1.273  | -3.933                | 0.003   |
| RAN         | 0.500   | 0.202        | 0.253                   | -0.182  | 0.743  | -2.210                | 0.909   |
| Age         | 0.500   | 0.972        | 34.109                  | -46.625 | 16.314 | -82.156               | -14.930 |
| RCPM        | 0.500   | 0.444        | 0.797                   | -2.390  | 3.438  | -10.786               | 0.035   |
| c. AVS      |         |              |                         |         |        |                       |         |
| Intercept   | 1.000   | 1.000        | 1.000                   | 824.625 | 12.366 | 799.090               | 846.770 |
| PPVT        | 0.500   | 0.345        | 0.526                   | 0.446   | 0.859  | -0.146                | 2.540   |
| EVT         | 0.500   | 0.459        | 0.849                   | -1.034  | 1.478  | -4.104                | 0.304   |
| RAN         | 0.500   | 0.204        | 0.257                   | -0.166  | 0.706  | -2.238                | 0.385   |
| Age         | 0.500   | 0.989        | 88.537                  | -48.664 | 13.753 | -73.538               | -23.345 |
| RCPM        | 0.500   | 0.276        | 0.382                   | -0.919  | 2.213  | -7.728                | 0.726   |
| d. EHC      |         |              |                         |         |        |                       |         |
| Intercept   | 1.000   | 1.000        | 1.000                   | 67.373  | 2.070  | 63.472                | 72.073  |
| PPVT        | 0.500   | 0.205        | 0.259                   | 0.009   | 0.063  | -0.101                | 0.195   |
| EVT         | 0.500   | 0.231        | 0.300                   | -0.030  | 0.111  | -0.386                | 0.133   |
| RAN         | 0.500   | 0.327        | 0.485                   | 0.087   | 0.177  | -0.051                | 0.517   |
| Age         | 0.500   | 0.973        | 36.159                  | -6.671  | 2.123  | -11.555               | -2.638  |
| RCPM        | 0.500   | 0.214        | 0.271                   | -0.055  | 0.295  | -1.002                | 0.402   |

Note. Age = age in numbers; RCPM = nonverbal IQ of Raven; AS = MRTs of auditory stimuli; VS = MRTs of visual stimuli; AVS = MRTs of audiovisual stimuli; EHC= Slurp visual motor skills; PPVT= Peabody picture vocabulary test; EVT= expressive vocabulary test; RAN = rapid automatized task.
